# Supplementary material for: A graphene-like semiconducting BC2P monolayer as a promising material for a Li-ion battery and CO2 adsorbent
Source: Royal Society of Chemistry journal article supplement (doi:10.1039/d2cp04941d), 2022-12-21
Supplement: d2cp04941d1.pdf [file d2cp04941d1.pdf]

### Supplementary material

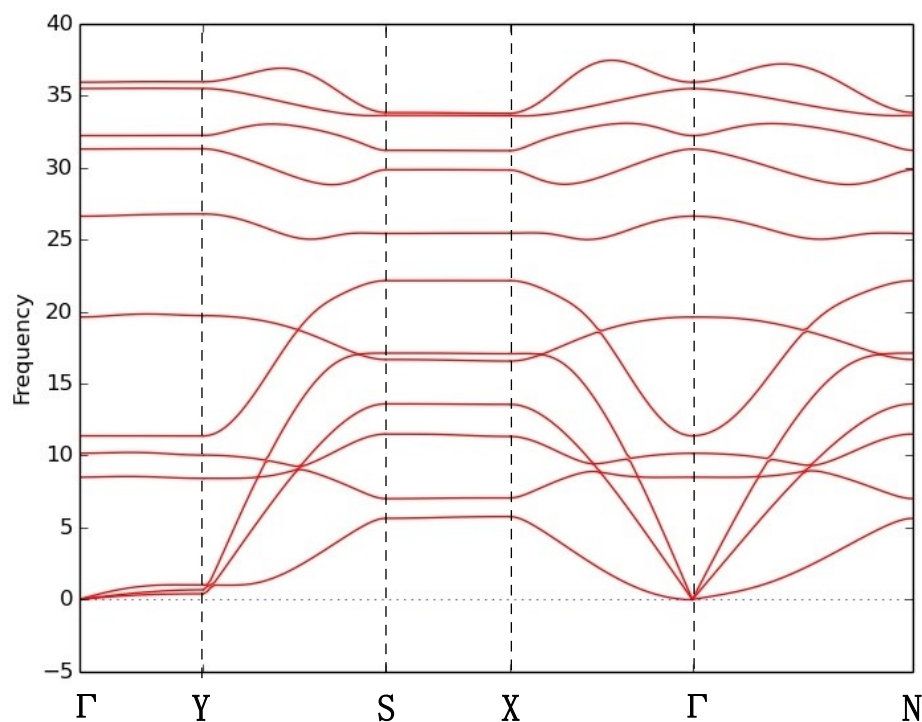

**Fig.S1** Phonon dispersion of the BC<sub>2</sub>P monolayer. The high symmetry points are  $\Gamma$  (0, 0, 0), Y(0, 0.5, 0), S/N(0.5, 0.5, 0) and X(0.5, 0, 0).

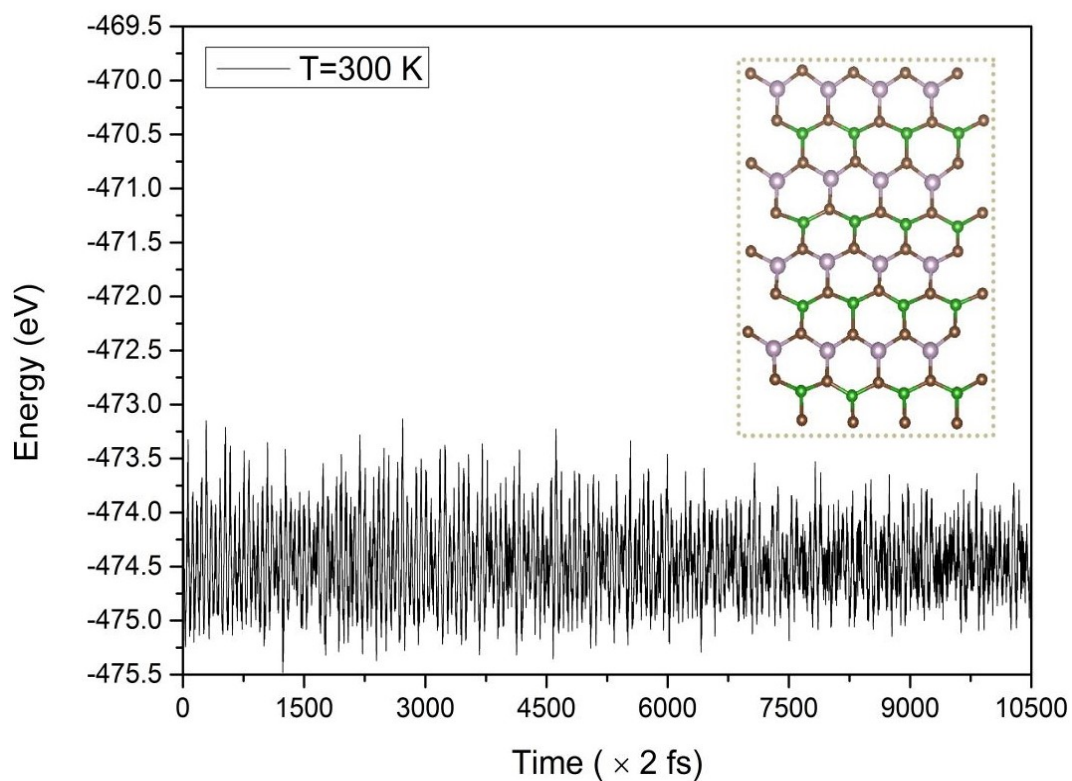

**Fig.S2** Energy oscillations of the MD simulation at room temperature for the 3 $\times$ 3 $\times$ 1 supercell of BC<sub>2</sub>P monolayer.

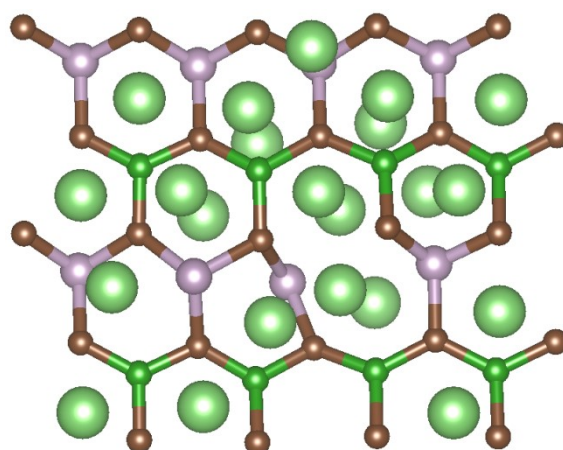

(a)

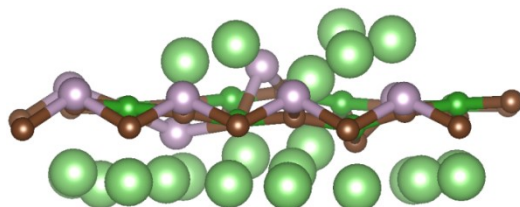

(b)

**Fig.S3** Top and side views of optimized adsorption configuration with the number of adsorbed Li atoms as  $n=22$ .

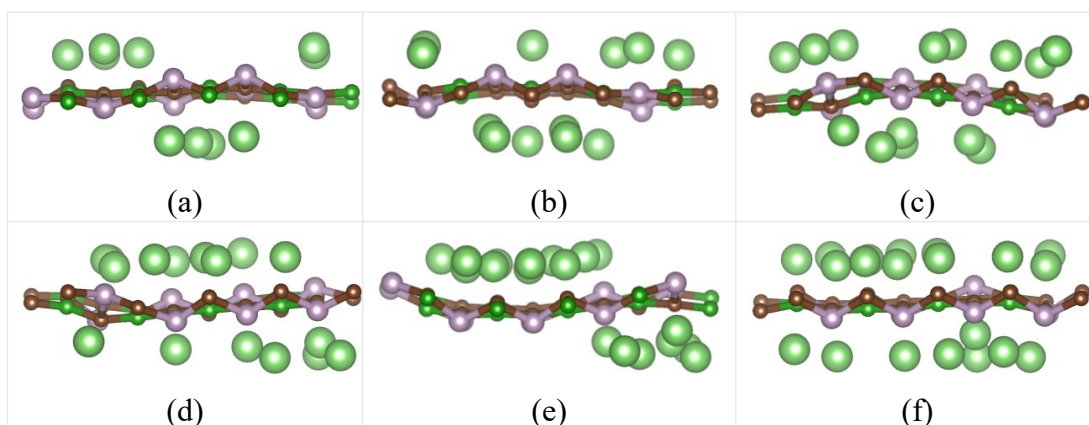

**Fig.S4** The side views of optimized adsorption configuration for the six different Li concentrations with  $n=10, 12, 14, 16, 18, 20$  (i.e. (a)  $\text{BC}_2\text{PLi}_{1.25}$ , (b)  $\text{BC}_2\text{PLi}_{1.5}$ , (c)  $\text{BC}_2\text{PLi}_{1.75}$ , (d)  $\text{BC}_2\text{PLi}_2$  (e)  $\text{BC}_2\text{PLi}_{2.25}$ , (f)  $\text{BC}_2\text{PLi}_{2.5}$ ).

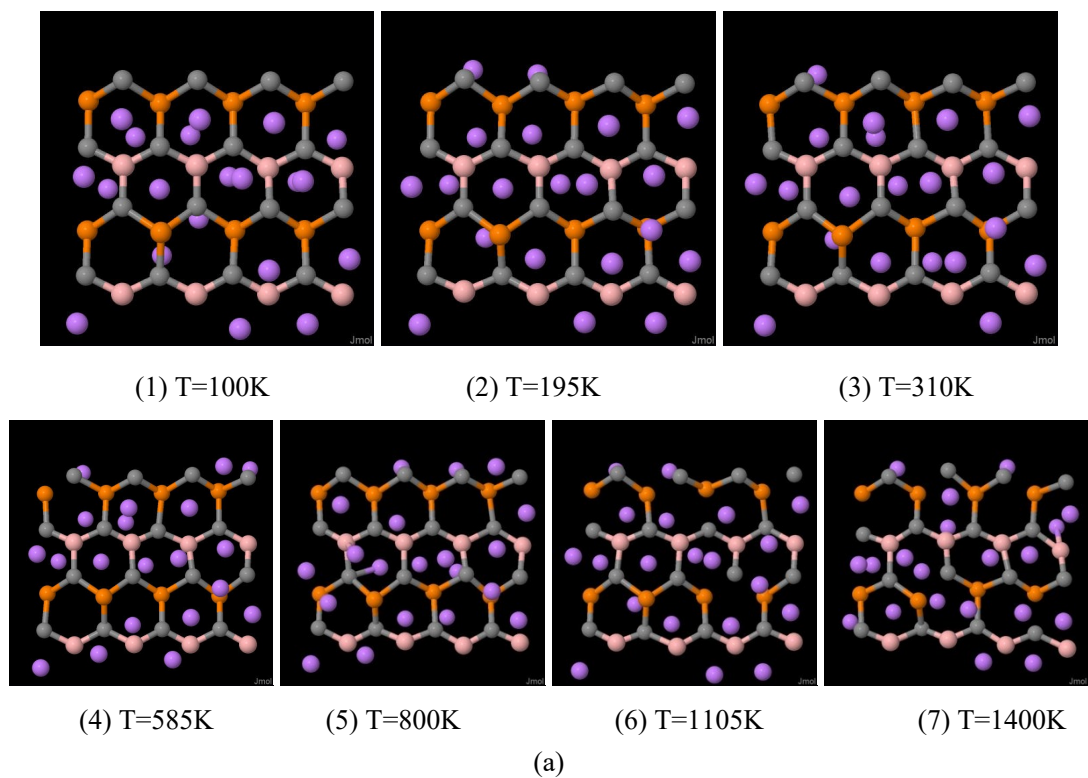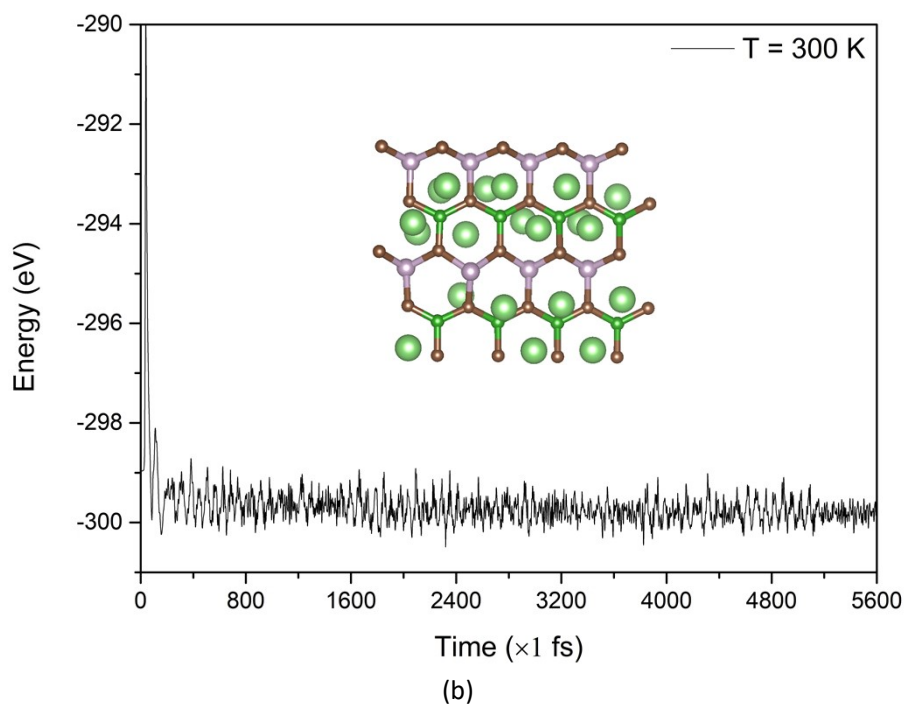

**Fig.S5** (a) Snapshots of the MD simulation for the  $\text{Li}_{2.5}\text{BC}_2\text{P}$  supercell with the temperature from 100K to 1400K. (b) Energy oscillations of the equilibrium MD simulation at room temperature 300 K for the  $\text{Li}_{2.5}\text{BC}_2\text{P}$  supercell.

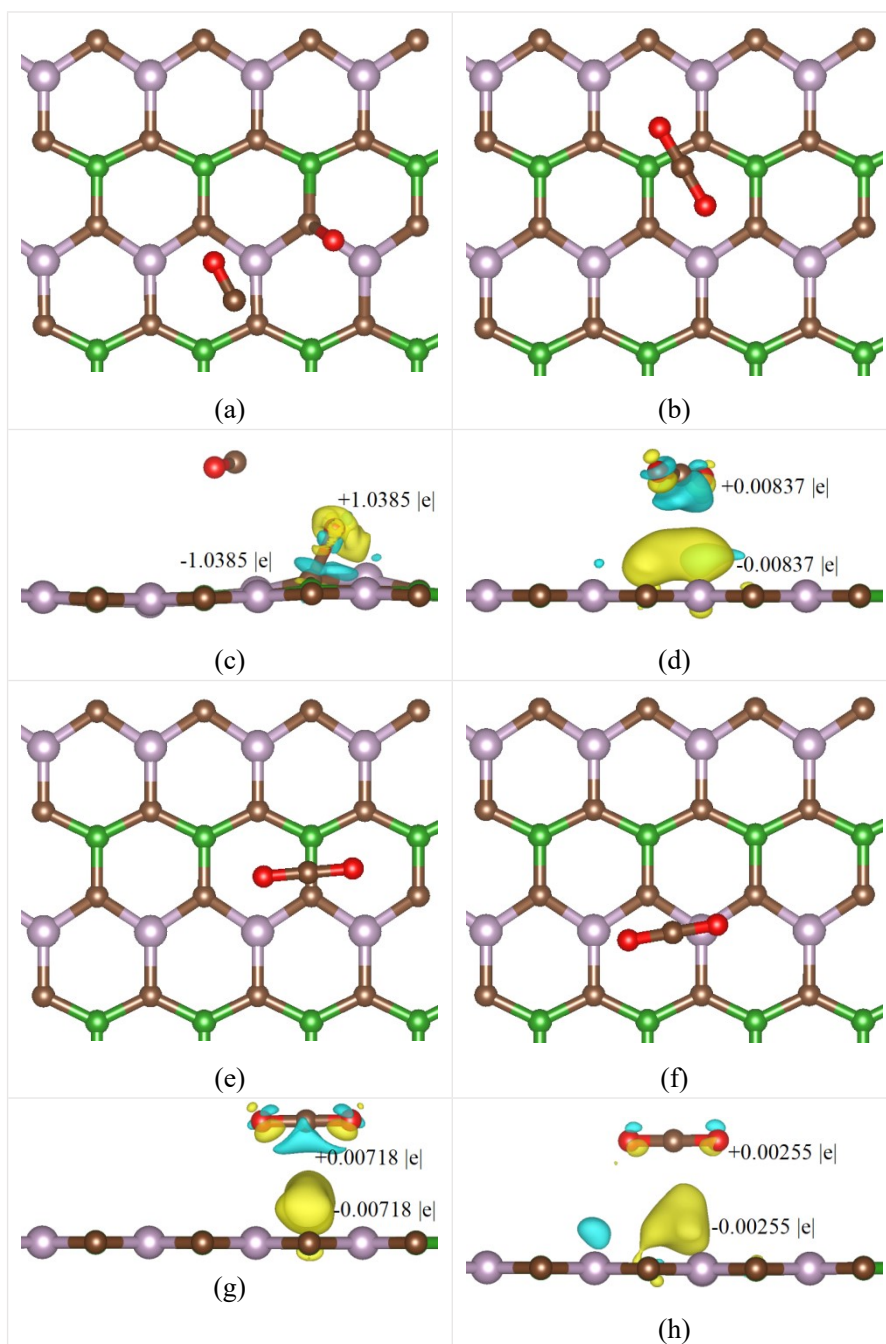

**Fig.S6** (a), (c) Top and side views of the top sites of C atoms on the supercell of BC<sub>2</sub>P monolayer with the ISO as 0.015 e<sup>-</sup>/Bohr<sup>3</sup>. (b), (d), (e), (g) and (f), (h) Top and side views of two B-C bond sites and the B-C bond site on the BC<sub>2</sub>P supercell, which including the CDD and the ISO 0.0003 e<sup>-</sup>/Bohr<sup>3</sup>.
